# Supplementary material
Source: PubMed Central journal article supplement (PMC6637256)
Supplement: plantbiotechnology-33-4-16.0215b-s001.pdf [file plantbiotechnology-33-4-16.0215b-s001.pdf]

Supplementary Table 1. Primers used in this study

| Purpose                                                               | Gene                      | Primer sequence (5' to 3')                                                                                                  |
|-----------------------------------------------------------------------|---------------------------|-----------------------------------------------------------------------------------------------------------------------------|
| quantitative RT-PCR                                                   | <i>FLC</i>                | TCCGGCAAGCTCTACAGCTT<br>GCTGTTTCCCATATCGATCAAGGA                                                                            |
|                                                                       | <i>FT</i>                 | CTGCTACAACCTGGAACAACCTTTG<br>TTTGCCTGCCAAGCTGTCGAA                                                                          |
|                                                                       | <i>SOC1</i>               | ATGAATTCGCCAGCTCCAATATGC<br>TGGTGCTGACTCGATCCTTAGTA                                                                         |
|                                                                       | <i>TSF</i>                | CACTGGAAATGCCTTTGGCAATGA<br>CTTCCGAGTTGCCGGAACAA                                                                            |
|                                                                       | <i>CO</i>                 | CTCACTACAACGACAATGGTTCCA<br>CTTGGGTGTGAAGCTGTTGTGA                                                                          |
|                                                                       | <i>SVP</i>                | TTCTGTAGCTCCAGCATGAAGGA<br>AGATGGCTGATCAAGCTTCTCCAA                                                                         |
|                                                                       | <i>LHP1</i>               | GCTCACAATCCTCATCTCCTGATT<br>CCTACAAGGGCTGTGTACAAACA                                                                         |
|                                                                       | <i>TEM1</i>               | GAGCCGGTGATGTGGTTTGT<br>GACCGGACTTTCCAGTGGATATA                                                                             |
|                                                                       | <i>MYB33</i>              | GCACGTATGGCTGCACATTTG<br>GCTCGTTGTCGCCTCTTGATA                                                                              |
|                                                                       | <i>ELF6</i>               | AGGAGAGACAGATGCTCAGGAAAT<br>GAGGCAGAAAATGCGAGGTCTTA                                                                         |
| semi-quantitative RT-PCR                                              | <i>ANAC075</i> full       | ATGAACAAGAGTAATCCTGCTG<br>TTACCCATGATGATCTTGGTTGTC                                                                          |
|                                                                       | <i>ANAC075</i> downstream | GGAGGGAAACTCCTCAGACT<br>GGTAGAAGAAGTGCAGCCCATTA                                                                             |
|                                                                       | <i>ACT2</i>               | ACATTGTGCTCAGTGGTGA<br>GAGATCCACATCTGCTGGAAT                                                                                |
| Promoter amplification (for fusion with GUS)                          | <i>ANAC075</i>            | TAACAAGGCGCGCCGAAATGGGATAAAACGGAGCTCAAAT<br>ATTCTGGATCCATCTCAATCTCGAATATCTTTGATCA                                           |
| CDS amplification without a stop codon (for entry clone construction) | <i>ANAC075</i>            | GGGGACAAGTTTGTACAAAAAAGCAGGCTCCATGAACAAGAGTAATCCTGCTGGTTCGG<br>GGGGACCACTTTGTACAAGAAAGCTGGGTCCCATGATGATCTTGGTTGTCAGAAGAGT   |
|                                                                       | <i>ANAC052</i>            | GGGGACAAGTTTGTACAAAAAAGCAGGCTTCATGGGTCGCGAATCTGTGGCTGTTG<br>GGGGACCACTTTGTACAAGAAAGCTGGGTTTTGTCCATTAGCATTGTTCTTCTTG         |
|                                                                       | <i>JMJ14</i>              | GGGGACAAGTTTGTACAAAAAAGCAGGCTTCATGGATCAGCTTGCATCTCTAGCAGAGT<br>GGGGACCACTTTGTACAAGAAAGCTGGGTTAGGACTTATCTCCATCTTATCAACCAAAGT |
